# Supplementary material for: Working relationship between primary and specialist care in analysing elevated liver values—a survey from the point of view of gastroenterologists
Source: Springer Nature journal article supplement (doi:10.1007/s10354-021-00855-5), 2021-06-29
Supplement: MOESM1 [file 19313748]

**1. Auf welchem Weg kommen Patienten mit (unklar) erhöhten Leberwerten üblicherweise in Ihre Praxis? (Mehrfachangabe möglich)**

- Überweisung durch den Hausarzt  Überweisung durch einen anderen Facharzt  Auf Anraten der Klinik  
 Direktes Aufsuchen durch den Patienten  Sonstiges, und zwar: \_\_\_\_\_  Keine Angabe

**2. Wie viele dieser Patienten haben klinische Symptome, wie viele haben lediglich erhöhte Leberwerte?**

Klinische Symptome:  Sehr viele  Eher viele  Durchschnittlich  Eher wenige  Sehr wenige  Keine Angabe

Erhöhte Leberwerte:  Sehr viele  Eher viele  Durchschnittlich  Eher wenige  Sehr wenige  Keine Angabe

**3. Welche der folgenden Untersuchungen zur Identifizierung und weiteren Abklärung von Lebererkrankungen bieten Sie vor Ort in Ihrer Praxis an?**

- Oberbauchsonografie  Erweiterte Labor-Diagnostik  Elastografie  Leberbiopsie  Gastroskopie  
 Ileo-Koloskopie  Sonstiges, und zwar: \_\_\_\_\_  Keine Angabe

**4. Allgemein gefragt: Was sind für Sie die häufigsten Hinweise auf eine beginnende Lebererkrankung und veranlassen Sie zu einer tiefergehenden Diagnostik?**

- |                                                   |                                                      |                                                         |
|---------------------------------------------------|------------------------------------------------------|---------------------------------------------------------|
| <input type="radio"/> Langjähriger Alkoholkonsum  | <input type="radio"/> Oberbauchbeschwerden           | <input type="radio"/> Stuhlgang- und Verdauungsprobleme |
| <input type="radio"/> Müdigkeit, Abgeschlagenheit | <input type="radio"/> Rezidivierende Herzbeschwerden | <input type="radio"/> Vermuteter Alkoholmissbrauch      |
| <input type="radio"/> Persistierende Diarrhoe     | <input type="radio"/> Chronischer Juckreiz           | <input type="radio"/> Rezidivierende Blasenentzündungen |
| <input type="radio"/> Rezidivierendes Nasenbluten | <input type="radio"/> Anhaltende Kopfschmerzen       | <input type="radio"/> Appetitverlust                    |
| <input type="radio"/> Gynäkomastie                | <input type="radio"/> Ascites                        | <input type="radio"/> Leberhautzeichen                  |
| <input type="radio"/> Karpaltunnelsyndrom         | <input type="radio"/> Multiple blaue Flecken         | <input type="radio"/> Genitalmykose                     |
| <input type="radio"/> Dupuytrensche Kontrakturen  | <input type="radio"/> Gewichtsveränderungen          |                                                         |

Weitere : \_\_\_\_\_

**5. Was schätzen Sie: Wie viele Abklärungen von Hepatopathien haben Sie in den zurückliegenden 12 Monaten durchgeführt?**

- Keine  1 – 10  11 – 20  21 – 30  31 – 40  41 – 50  51 – 60  Mehr als 60  Keine Angabe

**6. Bei wie vielen Ihrer Patienten ist in den zurückliegenden 12 Monaten eine Leberzirrhose erstmals diagnostiziert worden?**

- Keine  1 – 3  4 – 6  7 – 10  11 – 15  16 – 20  21 – 25  Mehr als 25  Keine Angabe

**7. Wie viele Patienten mit Leberzirrhose betreuen Sie in etwa aktuell bei sich in der Praxis?**

- Keine  1 – 3  4 – 6  7 – 10  11 – 15  16 – 20  21 – 25  Mehr als 25  Keine Angabe

**8. Wie hoch ist der Anteil von Patienten mit Lebererkrankungen in Ihrer Praxis?**

- Unter 5%  6 – 10%  10 – 15%  16 – 20%  Mehr als 20%  Keine Angabe

**9. Welche Laborwerte, die im Zusammenhang mit Lebererkrankungen stehen können, untersuchen Sie üblicherweise bei einer allgemeinen Screening-Untersuchung bei Ihren Patienten?**

- |                                               |                                                 |                                                         |
|-----------------------------------------------|-------------------------------------------------|---------------------------------------------------------|
| <input type="radio"/> Alanin-Aminotransferase | <input type="radio"/> Aspartat-Aminotransferase | <input type="radio"/> Gamma-Glutamyltransferase         |
| <input type="radio"/> Cholinesterase          | <input type="radio"/> Bilirubin                 | <input type="radio"/> Albumin                           |
| <input type="radio"/> Ferritin                | <input type="radio"/> Quick/INR                 | <input type="radio"/> MCV                               |
| <input type="radio"/> AMA, AMA/M2             | <input type="radio"/> anti-LKM, anti-SLA        | <input type="radio"/> p- und c-ANCA                     |
| <input type="radio"/> Hepatitis B/D           | <input type="radio"/> Hepatitis C               | <input type="radio"/> Hepatitis E                       |
|                                               |                                                 | <input type="radio"/> Immunglobuline                    |
|                                               |                                                 | <input type="radio"/> Alkalische Phosphatase            |
|                                               |                                                 | <input type="radio"/> Thrombozytenzahl                  |
|                                               |                                                 | <input type="radio"/> Weitere Autoantikörper (ANA etc.) |

Weitere : \_\_\_\_\_

**10. Wenn Sie sich festlegen müssten: Was sind aus Ihrer Sicht die drei wichtigsten Indikatoren zur Früherkennung einer Leberzirrhose?**

- |                                               |                                                 |                                                         |
|-----------------------------------------------|-------------------------------------------------|---------------------------------------------------------|
| <input type="radio"/> Alanin-Aminotransferase | <input type="radio"/> Aspartat-Aminotransferase | <input type="radio"/> Gamma-Glutamyltransferase         |
| <input type="radio"/> Cholinesterase          | <input type="radio"/> Bilirubin                 | <input type="radio"/> Albumin                           |
| <input type="radio"/> Ferritin                | <input type="radio"/> Quick/INR                 | <input type="radio"/> MCV                               |
| <input type="radio"/> AMA, AMA/M2             | <input type="radio"/> anti-LKM, anti-SLA        | <input type="radio"/> p- und c-ANCA                     |
| <input type="radio"/> Hepatitis B/D           | <input type="radio"/> Hepatitis C               | <input type="radio"/> Hepatitis E                       |
|                                               |                                                 | <input type="radio"/> Immunglobuline                    |
|                                               |                                                 | <input type="radio"/> Alkalische Phosphatase            |
|                                               |                                                 | <input type="radio"/> Thrombozytenzahl                  |
|                                               |                                                 | <input type="radio"/> Weitere Autoantikörper (ANA etc.) |

Weitere : \_\_\_\_\_

**11. Wie häufig kommt es vor, dass Sie leberassoziierte Laborwerte zur Kontrolle erheben, die bereits vom Hausarzt ermittelt wurden?**

- Häufig  Gelegentlich  Selten  Nie  Keine Angabe

**12. Wie häufig kommt es vor, dass Sie zusätzliche leberassoziierte Laborwerte erheben, die nicht vom Hausarzt ermittelt wurden?**

- Häufig  Gelegentlich  Selten  Nie -> Bitte direkt zu Frage 14 übergehen  Keine Angabe

**13. Um welche zusätzlich erhobenen Werte handelt es sich?**

- |                                               |                                                 |                                                         |
|-----------------------------------------------|-------------------------------------------------|---------------------------------------------------------|
| <input type="radio"/> Alanin-Aminotransferase | <input type="radio"/> Aspartat-Aminotransferase | <input type="radio"/> Gamma-Glutamyltransferase         |
| <input type="radio"/> Cholinesterase          | <input type="radio"/> Bilirubin                 | <input type="radio"/> Albumin                           |
| <input type="radio"/> Ferritin                | <input type="radio"/> Quick/INR                 | <input type="radio"/> MCV                               |
| <input type="radio"/> AMA, AMA/M2             | <input type="radio"/> anti-LKM, anti-SLA        | <input type="radio"/> p- und c-ANCA                     |
| <input type="radio"/> Hepatitis B/D           | <input type="radio"/> Hepatitis C               | <input type="radio"/> Hepatitis E                       |
|                                               |                                                 | <input type="radio"/> Alkalische Phosphatase            |
|                                               |                                                 | <input type="radio"/> Thrombozytenzahl                  |
|                                               |                                                 | <input type="radio"/> Weitere Autoantikörper (ANA etc.) |
|                                               |                                                 | <input type="radio"/> Immunglobuline                    |

Weitere : \_\_\_\_\_

**14. Über den Umgang mit moderat erhöhten Leberwerten gibt es unter Ärzten unterschiedliche Meinungen. Die einen halten es für besser, nach der Feststellung moderat erhöhter Leberwerte erst einmal abzuwarten und zu einem späteren Zeitpunkt eine erneute Untersuchung der Leberwerte durchzuführen. Die anderen bevorzugen eine möglichst direkte Überweisung zum Facharzt bzw. an eine Spezialambulanz. Einmal von speziellen oder eindeutigen Einzelfällen abgesehen, was halten Sie grundsätzlich für sinnvoller?**

- Kontrolliertes Zuwarten  Überweisung an Facharzt  Überweisung an eine Leberspezialambulanz  
 Schwer zu sagen, Unentschieden  Keine Angabe

**15. Was ist Ihrer Ansicht nach ein adäquater Zeitraum für ein kontrolliertes Zuwarten?**

\_\_\_\_\_ Wochen

**16. Wenn Sie an die Patienten denken, bei denen Sie in den letzten Jahren eine beginnende Lebererkrankung festgestellt haben: Worin bestand für Sie im Anschluss an die Diagnose der nächste Schritt?**

- Patient bleibt zur Beobachtung bzw. Weiterbehandlung in meiner Sprechstunde  Überweisung an eine Leberspezialambulanz  Rücküberweisung zum Hausarzt zwecks weiterer Beratung bzw. Abklärung
- Sonstiges, und zwar: \_\_\_\_\_  Keine Angabe

**17. Wie häufig kommt es vor, dass Sie bei Patienten eine (beginnende) Lebererkrankung entdeckt haben, auf die der Hausarzt nicht aufmerksam wurde bzw. die beim Hausarzt unerkannt blieb?**

- Häufig  Gelegentlich  Selten  Nie

**18. Was würden Sie sagen: Wie viele Patienten, die mit erhöhten Leberwerten an Ihre Praxis überwiesen werden, erweisen sich letztlich als unspezifisch?**

- Sehr viele  Eher viele  Durchschnittlich  Eher wenige  Sehr wenige  Schwer zu sagen

**19. Wie beurteilen Sie aus Ihrer eigenen Erfahrung die Zusammenarbeit zwischen niedergelassenen Gastroenterologen und Hausärzten, wenn es um die Abklärung unklarer Leberwerterhöhungen oder der Diagnosestellung Leberzirrhose geht?**

- Sehr gut  Eher gut  Eher schlecht  Sehr schlecht  Schwer zu sagen  Keine Angabe

**20. Und wie beurteilen Sie aus Ihrer eigenen Erfahrung die Zusammenarbeit zwischen niedergelassenen Gastroenterologen und Leberspezialambulanzen, wenn es um die Abklärung unklarer Leberwerterhöhungen oder der Diagnosestellung Leberzirrhose geht?**

- Sehr gut  Eher gut  Eher schlecht  Sehr schlecht  Schwer zu sagen  Keine Angabe

**21. Bei der Zusammenarbeit zwischen niedergelassenen Gastroenterologen und Hausärzten zur Abklärung einer Leberzirrhose können verschiedene Schwierigkeiten auftreten. Wie häufig treten die folgenden Schwierigkeiten Ihrer Erfahrung nach auf?**

Hausärzte leiten Patienten vorschnell zum Gastroenterologen weiter, wodurch gastroenterologische Gebietsärzte auf lange Zeit ausgebucht sind.

- Häufig                       Gelegentlich                       Selten                       Nie

Hausärzte informieren gastroenterologische Gebietsärzte nicht ausreichend über die von ihnen durchgeführten Untersuchungen, Ergebnisse und/oder gestellte Diagnosen.

- Häufig                       Gelegentlich                       Selten                       Nie

Der Wissensstand von Hausärzten im Zusammenhang mit (unklar) erhöhten Leberwerten ist nicht immer ausreichend, um frühzeitig auf eine beginnende Lebererkrankung aufmerksam zu werden.

- Häufig                       Gelegentlich                       Selten                       Nie

Die von Hausärzten zum Gastroenterologen weitergeleiteten Patienten mit (unklar) erhöhten Leberwerten erweisen sich häufiger mal als unspezifisch.

- Häufig                       Gelegentlich                       Selten                       Nie

Hausärzte warten zu lange, bis sie Patienten mit (unklar) erhöhten Leberwerten beim Gastroenterologen vorstellen.

- Häufig                       Gelegentlich                       Selten                       Nie

Die von Hausärzten im Vorfeld geleistete Abklärung bzw. Basisdiagnostik zur Erkennung von (beginnenden) Lebererkrankungen könnte besser sein.

- Häufig                       Gelegentlich                       Selten                       Nie

Viele Hausärzte überweisen direkt zu einer Leberspezialambulanz, obwohl der niedergelassene Gastroenterologe der bessere Ansprechpartner wäre.

- Häufig                       Gelegentlich                       Selten                       Nie

Leberwerterhöhungen werden von Hausärzten oft nicht weiter verfolgt.

- Häufig                       Gelegentlich                       Selten                       Nie

Der Zeitdruck in der gastroenterologischen Praxis ist so groß, dass zwecks weiterer Abklärung zum Hausarzt zurücküberwiesen werden muss.

- Häufig                       Gelegentlich                       Selten                       Nie

Hausärzte meiden die Abklärung von Leberwerterhöhungen, weil die Vergütung im Verhältnis zum Aufwand nicht attraktiv genug ist.

- Häufig                       Gelegentlich                       Selten                       Nie

Die fachärztliche Versorgungsdichte in meiner Region ist nicht ausreichend, sodass viele hausärztliche Patienten mit Leberwerterhöhungen nicht adäquat und zeitnah versorgt werden können.

- Häufig                       Gelegentlich                       Selten                       Nie

**22.** Aufgrund der zunächst relativ unspezifischen Symptomatik wird die Diagnose einer Leberzirrhose erst in fortgeschrittenem Stadium gestellt. Zur Verbesserung der Früherkennung gibt es den Vorschlag, einen strukturierten Diagnose- und Therapiealgorithmus zu etablieren, der Hausärzten bestimmte Verhaltensanweisungen zum Umgang mit erhöhten Leberwerten gibt und die Versorgungskoordination mit gastroenterologischen Fachärzten verbessert.

Für wie effektiv halten Sie eine solche Maßnahme, um den Frühdiagnose-Anteil von Patienten zu erhöhen?

Sehr effektiv  Eher effektiv  Weniger bzw. gar nicht effektiv  Weiß nicht

**23.** Wie kompetent fühlen Sie sich, wenn es darum geht, den Verdacht auf eine Lebererkrankung nach Feststellung erhöhter Leberwerte abzuklären?

Sehr kompetent  Eher kompetent  Eher nicht so kompetent  Keine Angabe

**24.** Wie kompetent fühlen Sie sich bei der Behandlung und Betreuung von Patienten mit Leberzirrhose?

Sehr kompetent  Eher kompetent  Eher nicht so kompetent  Keine Angabe

**25.** Wie würden Sie das generell einschätzen: Sind die meisten fachärztlich tätigen Internisten und Gastroenterologen ausreichend kompetent, wenn es darum geht, Lebererkrankungen abzuklären, oder sehen Sie hier Nachholbedarf?

Ausreichend kompetent  Gewisser Nachholbedarf  Großer Nachholbedarf  Schwer zu sagen

*Nun bräuchten wir noch einige statistische Angaben von Ihnen. Wie auch der Rest des Fragebogens werden diese Informationen natürlich streng vertraulich behandelt und anonymisiert.*

**Geschlecht:**  Männlich  Weiblich

Ihr **Alter:** \_\_\_\_\_

Ihr **Bundesland:**  Baden-Württemberg  Hessen

**Wo befindet sich Ihre Praxis?** In einer Gemeinde/Stadt mit . . .

mehr als 100.000  20.000-100.000  5.000 bis 20.000  unter 5.000 Einwohnern

**Welches Niederlassungsmodell** beschreibt Ihre Praxis am besten?

Einzelpraxis (Praxisinhaber ist der einzige Arzt)  Einzelpraxis mit angestellten Ärzten \*  Gemeinschaftspraxis \*

Medizinisches Versorgungszentrum \*

**Sie sind...**

Facharzt für Innere Medizin  Facharzt für Innere Medizin und Gastroenterologie

Sonstiges, und zwar: \_\_\_\_\_

**\* Wie viele Ärzte** sind in Ihrer Praxis tätig?

1 Arzt  2 Ärzte  3 Ärzte  Mehr als drei Ärzte

**Wie viele Patienten** behandelt Ihre Praxis im Quartal?

750-1000  1000-1500  1500-2000  Mehr als 2000

**Vielen Dank für Ihre Teilnahme!**

Was möchten Sie uns noch mitteilen?

Hier finden Sie Platz für Anregungen, Kommentare und Kritik.

---

---

---
